# Supplementary material for: Plant evolution in alkaline magnesium-rich soils: A phylogenetic study of the Mediterranean genus Hormathophylla (Cruciferae: Alysseae) based on nuclear and plastid sequences
Source: PLoS One. 2018 Dec 21;13(12):e0208307. doi: 10.1371/journal.pone.0208307 (PMC6303028; doi:10.1371/journal.pone.0208307)
Supplement: S3 Table — (XLSX) [file pone.0208307.s003.xlsx]

## Sheet: EDITADO
	position	ploidy level		222	233	234	236	252	461	473	592		number of APS
species	sample ID.
H.cochleata subsp. baetica	16_01			G	C	G	G	A	T	Y	C
H.cochleata subsp. baetica	16_02			.	.	.	.	.	.	.	.
H. longicaulis	01_01	8x	Boca de la Pescá	.	G	A	.	T	.	C	T	SN	0
H. longicaulis	01_02	8x		.	G	A	.	T	.	C	T	SN	0
H. longicaulis	03_01	8x,4x	Deifontes	.	G	A	.	T	.	C	T	SN	0
H. longicaulis	03_02	8x,4x		.	G	A	.	T	.	C	T	SN	0
H. longicaulis	04_01	8x	Dornajo	.	G	A	.	T	.	C	T	SN	0
H. longicaulis	04_02	8x		.	G	A	.	T	.	C	T	SN	0
H. longicaulis	05_01	4x	Bacares	.	.	A	R	T	W	.	.	FIL	2
H. longicaulis	05_02	4x		.	.	A	R	T	W	.	.	FIL	2
H. longicaulis	06_01	4x	Freila	.	G	A	.	T	.	C	.	BAZ	0
H. longicaulis	06_02	4x		.	G	A	.	T	.	C	.	BAZ	0
H. longicaulis	07_01	4x	Gor	.	G	A	.	T	.	C	.	BAZ	0
H. longicaulis	07_02	4x		.	G	A	.	T	.	C	.	BAZ	0
H. longicaulis	08_01	8x	El Madroñal	.	G	C	.	.	.	C	.	NIE	0
H. longicaulis	08_02	8x		.	G	C	.	.	.	C	.	NIE	0
H. cadevalliana	09_01	4x	Los Morrones	R	M	R	R	W	W	.	.	GAD	6
H. cadevalliana	09_02	4x		R	M	.	R	W	W	.	.	GAD	5
H. longicaulis	02_01	4x	Las Cabras	A	.	.	A	.	W	T	.	CAZ	1
H. longicaulis	02_02	4x		A	.	.	A	.	W	T	.	CAZ	1
H. cadevalliana	10_01	8x	Hinojora	A	.	.	R	T	A	T	.	BAZ	1
H. cadevalliana	10_02	8x		A	.		R	T	A	T	.	BAZ	1
H. cadevalliana	11_01	4x	Mahimón	A	.	.	A	W	A	.	.	MAR	1
H. cadevalliana	11_02	4x		A	.	.	A	W	A	T	.	MAR	1
H. cadevalliana	12_01	4x	María	A	.	.	A	W	A	T	.	MAR	1
H. cadevalliana	12_02	4x		A	.	.	A	W	A	T	.	MAR	1
H. cadevalliana	13_01	4x	Tajos de la Parra	R	.	R	A	W	W	.	.	GAD	4
H. cadevalliana	13_02	4x		R	.	R	A	W	W	.	.	GAD	4
H. cadevalliana	14_01	4x	Prados del Rey	R	M	R	R	W	W	.	.	BAZ	6
H. cadevalliana	14_02	4x		R	M	R	R	W	W	.	.	BAZ	6
H.reverchonii	15_01	4x		.	.	.	.	.	.	C	.	CAZ	0
H.reverchonii	15_02	4x		.	.	.	.	.	.	C	.	CAZ	0
H.reverchonii	15_03	4x		.	.	.	.	.	.	C	.	CAZ	0
